# Supplementary material
Source: HighWire-hosted journal article supplement (https://rapm.bmj.com/highwire/filestream/14041/field_highwire_adjunct_files/1/rapm-2020-101691supp002_data_supplement.pdf)
Supplement: rapm-2020-101691supp002_data_supplement.pdf [file rapm-2020-101691supp002_data_supplement.pdf]

**Appendix 2. Burn Mechanism Break-Down**

| Mechanism                   | Burn Source                            | N = 2013<br>N (%) |
|-----------------------------|----------------------------------------|-------------------|
| Scald                       | Fat/oil                                | 35 (1.7)          |
|                             | Food - noodles                         | 144 (7.2)         |
|                             | Food - other                           | 69 (3.4)          |
|                             | Hot beverages                          | 318 (15.8)        |
|                             | Steam from another source              | 11 (0.5)          |
|                             | Steam from radiator                    | 1 (0.0)           |
|                             | Steam vaporizer                        | 22 (1.1)          |
|                             | Syrup / sugary liquid                  | 1 (0.0)           |
|                             | Water from bucket / container          | 56 (2.8)          |
|                             | Water from hot water bottle            | 15 (0.7)          |
|                             | Water from radiator                    | 1 (0.0)           |
|                             | Water from saucepan / kettle           | 137 (6.8)         |
|                             | Water from tap / bath / shower / basin | 34 (1.7)          |
|                             | Contact                                | Barbeque          |
| Bitumen                     |                                        | 3 (0.1)           |
| Coals / ashes               |                                        | 100 (5.0)         |
| Exhaust - other             |                                        | 34 (1.7)          |
| Hair straightener           |                                        | 44 (2.2)          |
| Heat pack                   |                                        | 1 (0.0)           |
| Heater - electrical / gas   |                                        | 7 (0.3)           |
| Heater - wood               |                                        | 17 (0.8)          |
| Heater - other              |                                        | 13 (0.6)          |
| Hot ground                  |                                        | 11 (0.5)          |
| Hot metal - lawnmower       |                                        | 14 (0.7)          |
| Hot metal - other           |                                        | 132 (6.6)         |
| Campfire / burn-off         |                                        | 24 (1.2)          |
| Hotplate on stove           |                                        | 130 (6.5)         |
| Iron                        |                                        | 42 (2.1)          |
| Molten plastic / glue       |                                        | 17 (0.8)          |
| Stove/oven door             |                                        | 87 (4.3)          |
| Vehicle exhaust - car       |                                        | 9 (0.4)           |
| Vehicle exhaust - motorbike |                                        | 55 (2.7)          |
| Vacuum cleaner              |                                        | 1 (0.0)           |
| Wax                         | 9 (0.4)                                |                   |
| Chemical                    | Acid                                   | 5 (0.2)           |
|                             | Alkali                                 | 3 (0.1)           |

---

|                         |                                   |            |
|-------------------------|-----------------------------------|------------|
| Flame (Flash Inclusive) | Candle                            | 4 (0.2)    |
|                         | Bushfire                          | 1 (0.0)    |
|                         | Electrical fire                   | 1 (0.0)    |
|                         | Fireworks                         | 4 (0.2)    |
|                         | Lighter / matches                 | 9 (0.4)    |
| Friction                | Motorbike                         | 5 (0.2)    |
|                         | Pushbike                          | 14 (0.7)   |
|                         | Treadmill                         | 27 (1.3)   |
|                         | Road Surface                      | 12 (0.6)   |
| Radiant Heat            | Vehicle                           | 6 (0.3)    |
|                         | Radiotherapy                      | 1 (0.0)    |
|                         | Solar (sunburn)                   | 34 (1.7)   |
| Pressured Gas           | Heater - fireplace                | 1 (0.0)    |
|                         | Gas / gas bottle                  | 2 (0.1)    |
| Cooling                 | Aerosol                           | 4 (0.2)    |
| Other                   | Other                             | 210 (10.4) |
|                         | Not stated/inadequately described | 19 (0.9)   |

---

Abbreviation: N, number of participants
